# Supplementary material for: Genomic landscape of oral squamous cell carcinoma highlights prognostic significance of NOTCH1 mutations and subsite-specific differences
Source: Research Square preprint supplement (doi:10.21203/rs.3.rs-8623006/v1), 2026-01-22
Supplement: Supplementary file 1 [file 5aea1d637d448341a4d4395f.docx]

**Table 2.** Univariable and multivariable analyses for Relapse-Free Survival.


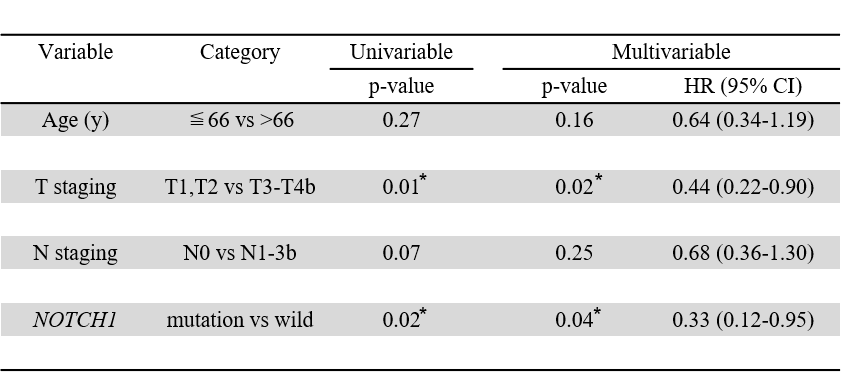


HR; hazard ratio

*Significant at p<0.05
