# Supplementary material for: Genomic landscape of oral squamous cell carcinoma highlights prognostic significance of NOTCH1 mutations and subsite-specific differences
Source: Research Square preprint supplement (doi:10.21203/rs.3.rs-8623006/v1), 2026-01-22
Supplement: Supplementary file 2 [file 9b0acd5e34049840964f1444.docx]

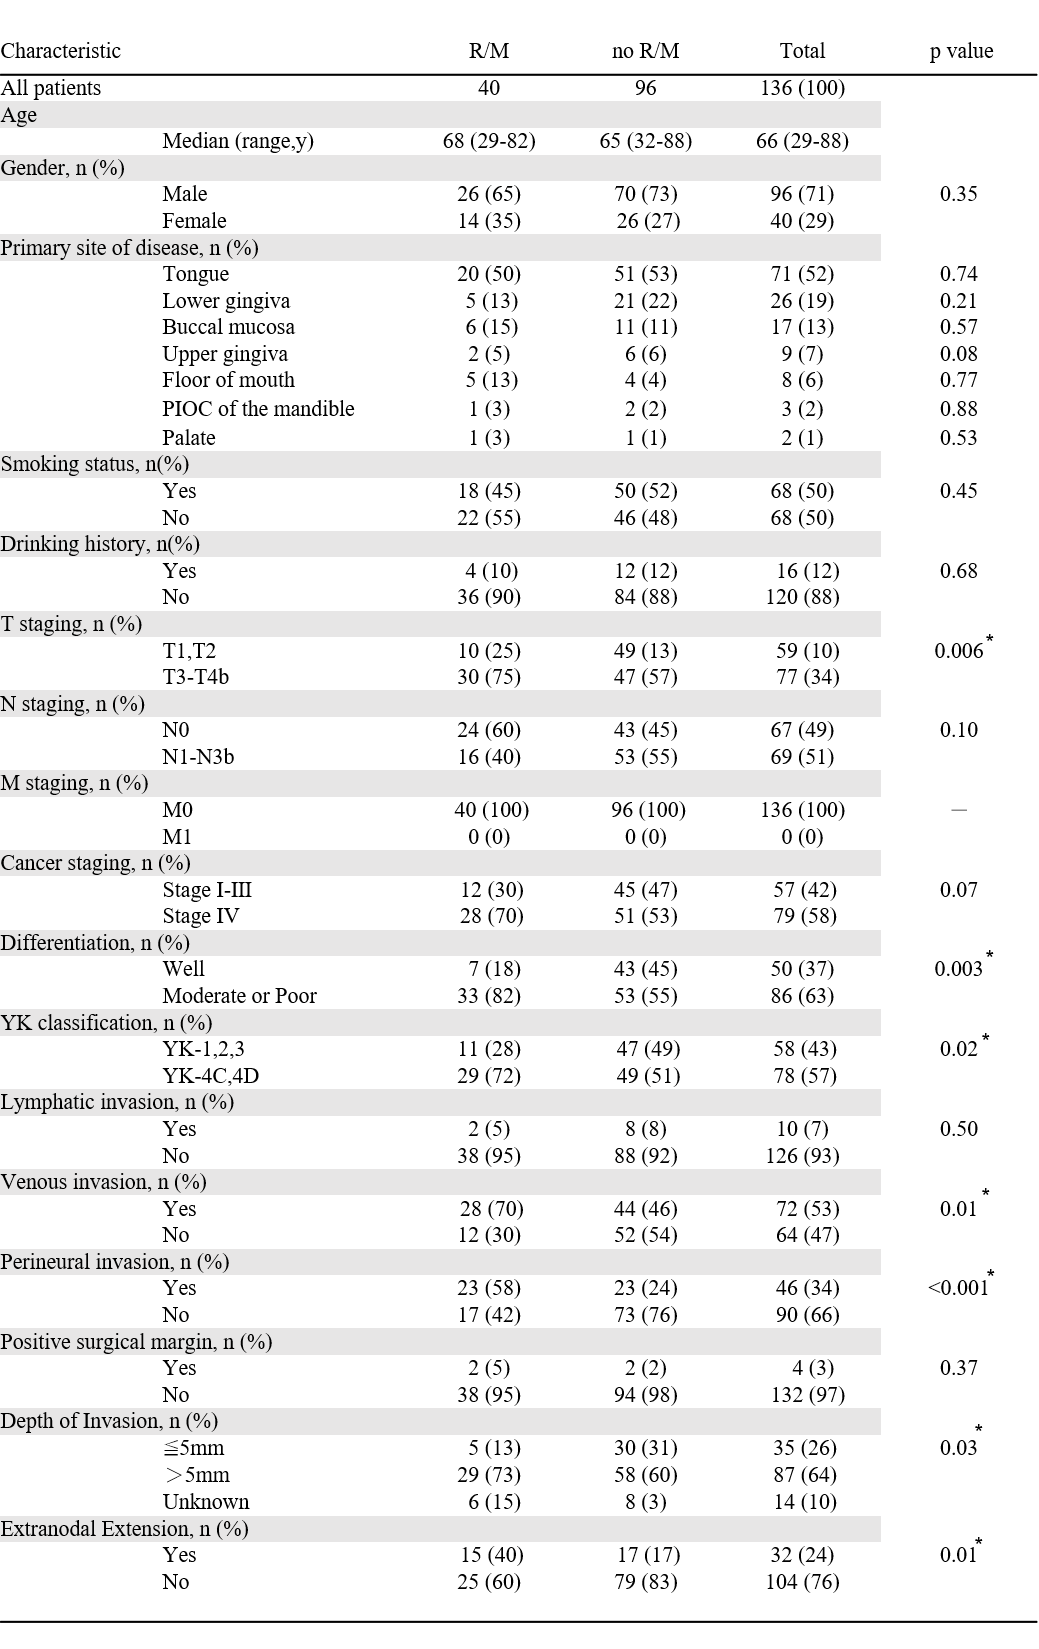
**Table 1.** Clinical characteristics.

R/M; recurrence or metastasis

PIOC; primary intraosseous carcinoma

YK; Yamamoto-Kohama

*Significant at p<0.05
