# Supplementary material for: Genomic landscape of oral squamous cell carcinoma highlights prognostic significance of NOTCH1 mutations and subsite-specific differences
Source: Research Square preprint supplement (doi:10.21203/rs.3.rs-8623006/v1), 2026-01-22
Supplement: Supplementary file 4 [file c5b3a299d95ed8ff4437dea2.docx]

**Table 3.** Comparison of clinical characteristics between *NOTCH1* mutation group and wild-type group.


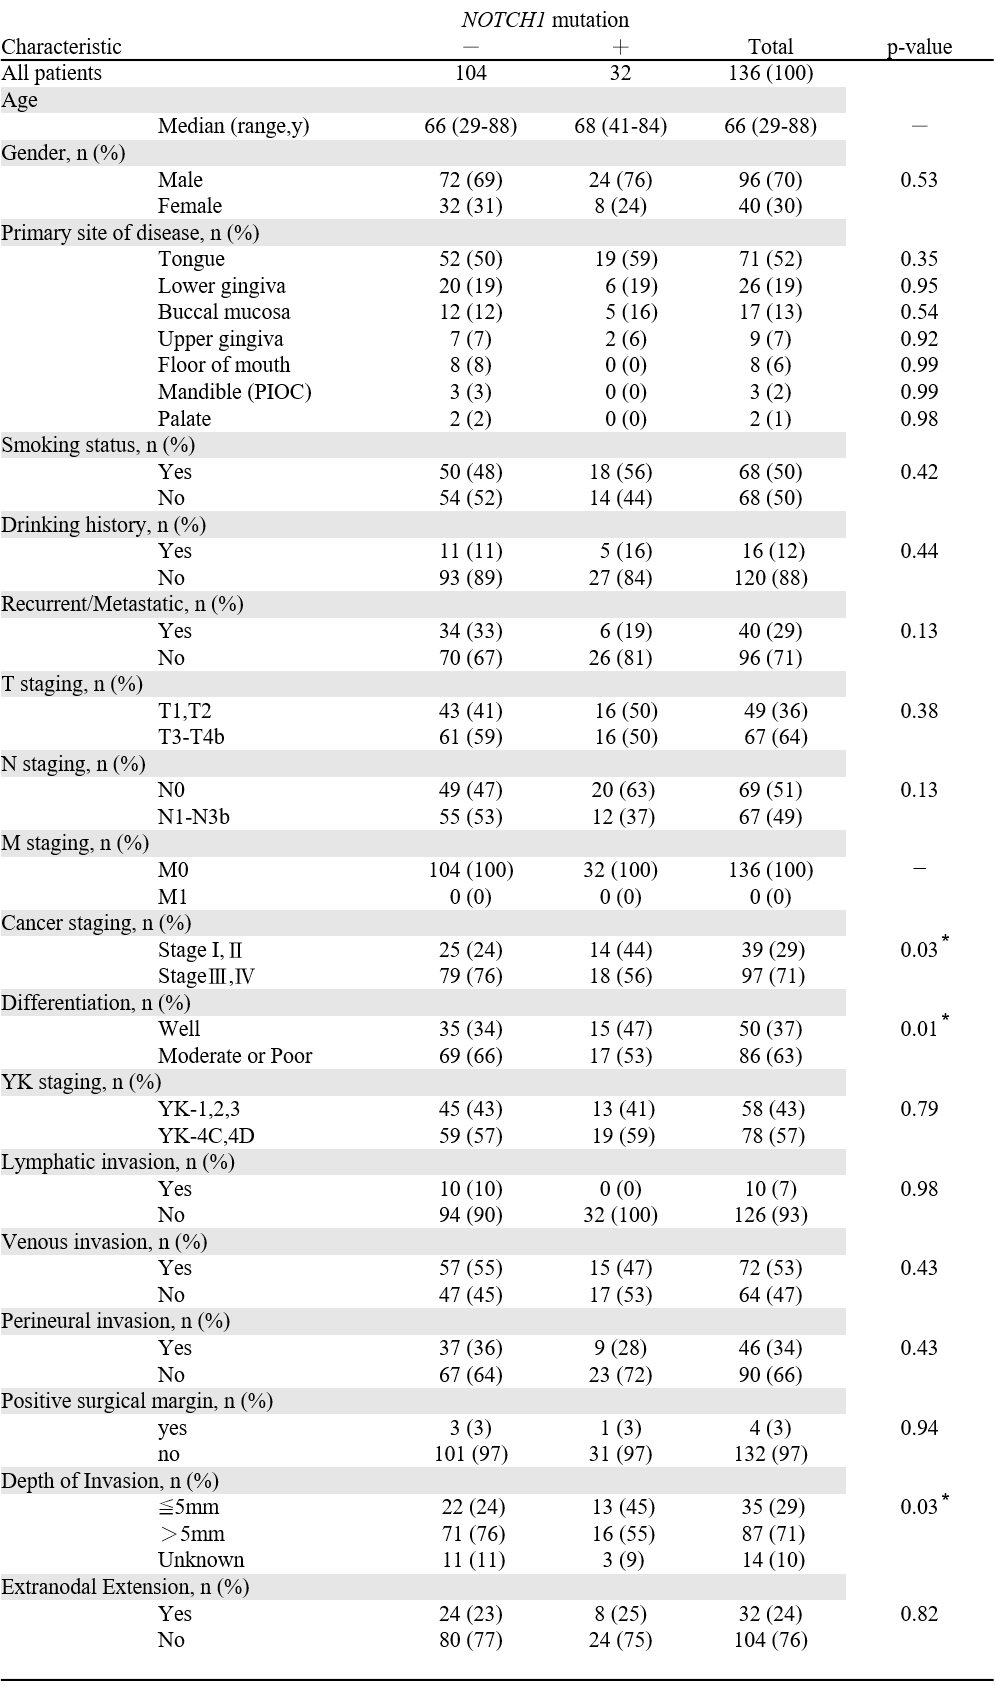


PIOC; primary intraosseous carcinoma

YK; Yamamoto-Kohama

*Significant at p<0.05
