# Supplementary figures and images for: Genomic landscape of oral squamous cell carcinoma highlights prognostic significance of NOTCH1 mutations and subsite-specific differences
Source: Research Square preprint supplement (doi:10.21203/rs.3.rs-8623006/v1), 2026-01-22

**Table 4.** Characteristics of *NOTCH1* mutation.


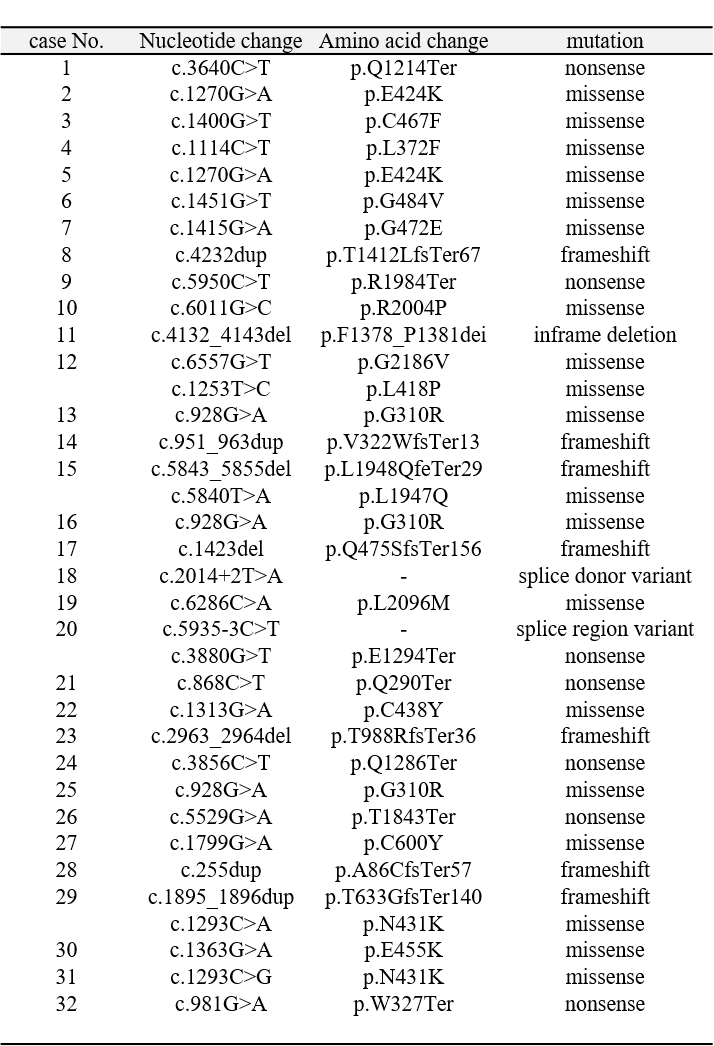

Supplement: Supplementary file 3 [file c13aa83e83b2a96fefe99aaf.docx]
